# Supplementary material for: Are Sports-Related Factors Correlated to the Prevalence and Initiation of Illicit Drug Misuse in Adolescence? Prospective Study in Older Adolescents
Source: Biomed Res Int. 2018 Nov 28;2018:1236284. doi: 10.1155/2018/1236284 (PMC6304193; doi:10.1155/2018/1236284)
Supplement: Supplementary Materials — Supplementary material: (a) questionnaire form used in the study (translated from local language). (b) Parental consent for the participation in the study for their child/children (translated from local language). (c) Data file. (d) Supplementary table: attrition bias analysis. [file 1236284.f1.zip]

Archive with 5 entries (4 files):
- Supplementary Materials/
- Supplementary Materials/data file.xlsx
- Supplementary Materials/PARENTAL consent form.docx
- Supplementary Materials/Questionnaire form.docx
- Supplementary Materials/Supplementary Table 1.docx
