# Supplementary material for: Are Sports-Related Factors Correlated to the Prevalence and Initiation of Illicit Drug Misuse in Adolescence? Prospective Study in Older Adolescents
Source: Biomed Res Int. 2018 Nov 28;2018:1236284. doi: 10.1155/2018/1236284 (PMC6304193; doi:10.1155/2018/1236284)
Supplement: Supplementary Materials — Supplementary material: (a) questionnaire form used in the study (translated from local language). (b) Parental consent for the participation in the study for their child/children (translated from local language). (c) Data file. (d) Supplementary table: attrition bias analysis. [file 1236284.f1.zip › Supplementary Materials/data file.xlsx]

## Sheet: Sheet1
	GENDER	AGE_b	INDIV_SPORT_b	TEAM_SPORT_b	EXPERIENCE_SPORT_b	COMP_ACH_SPORT_b	F_TRAINING_b	SOCIOECONOMIC_STATUS_b	PARENTAL_CONFLICT_b	DRUGS_b	INDIVIDUAL_SPORT_f	TEAM_SPORT_f	EXPERIENCE_SPORT_f	COMP_ACH_SPORT_f	F_TRAINING_f	SOCIOECONOMIC_STATUS_f	CONFLICT_PARENTS_f	DRUGS_f	DRUGS_INITIATION
1	1	16	3	3	1	1	0	2	3	1	3	3	1	1	1	2	2	0	1
2	1	16	2	2	3	1	1	2	1	1	3	2	3	1	1	2	1	0	1
3	1	15	1	1	4	2	2	2	2	2	1	1	4	2	3	2	2	0	1
4	2	16	3	3	1	1	0	2	2	1	3	3	1	1	0	2	1	0	1
5	2	16	3	3	1	1	0	2	2	1	3	3	1	1	1	2	2	0	1
6	2	16	3	3	1	1	0	2	2	1	2	2	2	1	1	2	3	0	1
7	1	17	3	3	1	1	0	2	4	1	3	3	2	2	1	2	2	0	1
8	2	17	3	3	1	1	1	2	3	1	3	3	1	1	1	2	2	0	1
9	2	16	1	1	3	2	2	2	2	1	2	3	2	1	1	2	1	2	2
10	1	16	1	2	4	2	3	2	2	1	1	2	4	2	4	2	2	0	1
11	1	16	2	2	2	2	1	2	1	1	3	3	1	1	0	2	2	0	1
12	1	16	1	1	4	2	2	2	1	1	2	2	4	4	2	2	1	0	1
13	1	16	2	1	3	1	1	2	1	1	2	2	3	3	1	2	1	0	1
14	1	17	2	1	3	2	2	2	2	1	1	1	3	2	1	2	2	0	1
15	1	16	2	2	2	1	1	2	2	1	3	2	2	1	2	2	1	0	1
16	1	16	2	2	3	2	2	2	2	1	1	1	4	2	2	2	1	0	1
17	1	16	1	1	4	2	2	2	1	1	1	1	4	2	3	2	1	0	1
18	1	16	2	2	4	2	2	2	2	1	2	2	4	2	2	2	2	0	1
19	1	16	2	2	2	2	1	2	2	1	3	2	2	1	1	2	2	2	2
20	1	16	3	3	1	1	0	2	3	1	3	3	1	1	0	2	3	0	1
21	1	16	2	2	3	3	3	2	1	1	2	2	4	2	3	2	1	0	1
22	1	16	1	2	2	1	1	2	1	1	2	3	2	1	1	2	2	0	1
23	1	16	3	1	4	2	2	2	1	1	4	2	4	2	1	2	1	0	1
24	1	16	3	3	1	1	0	2	1	1	3	2	4	2	4	2	1	0	1
25	1	16	3	1	4	3	4	2	2	1	1	1	4	3	3	2	3	0	1
26	2	17	3	3	1	1	2	2	1	1	3	2	2	1	1	2	1	0	1
27	1	17	1	1	4	3	4	2	1	1	1	1	4	3	3	2	1	0	1
28	1	16	2	2	3	2	2	2	1	1	2	2	3	2	2	2	1	0	1
29	2	16	3	3	1	1	0	2	2	1	3	3	1	1	2	2	3	0	1
30	1	16	3	1	4	2	2	2	1	1	2	1	4	2	1	2	1	0	1
31	2	16	3	3	1	1	0	2	2	1	3	3	1	1	0	2	3	0	1
32	1	16	1	1	3	2	2	2	1	1	1	1	4	2	2	2	1	0	1
33	1	16	3	3	1	1	0	2	2	1	3	3	2	2	2	2	1	0	1
34	1	16	3	2	3	2	1	2	2	1	2	2	3	2	1	2	2	0	1
35	1	16	3	3	1	1	0	2	1	1	3	3	1	1	0	2	2	0	1
36	1	16	2	2	3	2	2	2	1	1	2	2	3	1	2	2	2	0	1
37	1	17	1	3	4	4	3	2	1	2	1	2	4	3	3	2	1	2	1
38	2	17	2	3	2	1	1	2	2	2	3	3	1	1	0	2	2	2	1
39	2	17	3	3	1	1	0	2	2	2	3	3	1	1	0	2	2	2	1
40	2	16	3	2	2	1	1	2	2	1	2	2	3	1	1	2	2	0	1
41	1	16	2	2	3	2	1	3	3	1	2	2	2	1	1	2	2	0	1
42	2	17	3	2	3	2	3	2	2	1	2	2	3	2	3	2	3	0	1
43	2	16	1	3	2	1	1	2	3	1	3	3	2	1	1	2	3	0	1
44	2	16	2	3	3	3	1	2	2	1	3	3	1	1	0	1	4	2	2
45	1	16	2	2	3	1	1	2	3	1	2	2	3	1	1	2	1	0	1
46	2	16	3	3	1	1	0	2	2	1	3	3	0	0	0	1	3	0	1
47	1	16	1	1	4	2	2	3	2	1	2	2	4	2	2	3	3	0	1
48	1	17	2	2	3	1	2	3	1	1	2	2	3	1	2	3	3	0	1
49	1	16	2	2	4	2	3	3	3	1	2	2	4	2	3	3	2	0	1
50	1	16	3	3	3	0	0	2	3	1	3	2	3	2	1	2	2	0	1
51	1	16	1	2	3	1	2	2	3	1	1	2	4	1	3	2	2	0	1
52	1	17	3	2	2	1	1	2	1	1	2	1	2	1	1	2	1	0	1
53	1	16	1	1	4	2	3	2	1	1	1	2	4	3	3	2	1	0	1
54	1	17	2	2	3	1	0	2	3	1	2	2	4	1	1	2	3	0	1
55	2	17	2	2	2	1	2	2	3	1	2	2	3	2	2	2	3	0	1
56	2	17	3	3	1	1	0	2	3	1	3	3	1	1	0	2	2	0	1
57	2	17	2	3	2	1	2	2	2	1	3	2	2	1	2	2	1	0	1
58	1	16	2	2	3	2	2	2	1	1	2	2	3	2	2	2	1	0	1
59	2	17	2	2	2	2	2	2	4	1	2	1	3	1	1	2	2	2	2
60	1	16	3	2	3	2	2	2	2	1	2	2	3	2	2	2	1	0	1
61	1	16	2	2	4	3	2	2	2	1	2	2	3	3	2	2	1	0	1
62	2	17	3	3	1	1	0	3	3	1	2	2	2	1	1	3	3	0	1
63	2	16	3	3	1	1	1	3	3	1	3	3	1	1	1	2	3	0	1
64	2	16	2	3	3	1	2	2	3	1	2	3	2	1	2	2	3	0	1
65	2	16	1	3	4	2	2	2	2	1	1	3	4	1	2	2	2	0	1
66	0	16	2	3	3	2	1	2	2	1	2	3	3	2	1	2	2	0	1
67	2	16	3	3	1	1	0	2	2	1	3	3	1	1	1	2	2	0	1
68	1	16	1	2	3	1	2	3	2	1	1	2	3	1	3	3	2	0	1
69	2	16	2	2	2	1	2	2	1	1	2	2	3	2	1	2	2	0	1
70	1	16	2	1	4	2	2	2	2	1	2	1	4	2	2	2	3	0	1
71	1	16	3	2	3	2	2	2	1	1	3	2	4	3	2	2	2	2	2
72	1	16	2	2	3	3	2	2	4	1	2	2	3	3	2	2	4	0	1
73	0	16	2	2	4	2	2	2	3	1	2	2	3	2	2	2	3	0	1
74	1	17	3	1	4	2	2	2	3	1	3	1	4	2	2	2	2	2	2
75	1	16	3	1	4	2	2	2	2	1	3	1	4	2	2	2	1	0	1
76	2	17	3	3	1	1	0	2	1	1	3	3	1	1	1	2	1	0	1
77	2	16	2	2	3	2	2	2	2	1	1	1	4	2	2	2	2	0	1
78	2	17	3	3	1	1	0	2	3	1	3	3	1	1	1	2	3	0	1
79	2	16	3	3	1	1	0	2	2	1	3	3	1	1	1	2	2	0	1
80	2	17	3	3	1	1	0	2	1	1	3	2	2	1	1	2	1	0	1
81	2	17	3	3	1	1	0	2	1	1	2	2	3	1	1	2	2	0	1
82	2	16	3	2	2	1	1	2	1	1	2	2	2	1	1	2	1	0	1
83	2	17	3	2	2	2	1	2	1	1	1	2	3	1	2	2	1	0	1
84	2	16	3	2	2	1	1	2	1	1	3	2	2	1	1	2	2	0	1
85	1	16	1	1	4	2	2	3	1	1	1	1	4	3	4	3	2	0	1
86	2	16	3	2	3	1	1	2	2	1	2	2	3	1	2	2	2	0	1
87	2	16	3	2	2	2	1	2	1	1	3	2	3	2	1	2	1	0	1
88	1	16	1	1	4	2	2	2	1	1	1	1	3	2	2	2	2	0	1
89	1	16	2	2	4	1	1	2	1	1	2	3	3	1	3	2	1	0	1
90	1	17	2	2	3	2	2	2	1	1	2	2	3	2	2	2	1	0	1
91	2	16	3	3	1	1	0	2	3	1	3	3	1	1	0	2	1	0	1
92	2	16	3	3	1	1	0	2	3	1	3	2	3	1	1	2	2	0	1
93	2	16	2	1	2	2	0	2	3	1	3	3	2	2	1	2	3	0	1
94	1	16	2	1	2	1	2	2	1	1	3	1	3	1	2	2	1	0	1
95	2	16	3	3	1	1	0	2	2	1	3	2	2	2	1	2	1	0	1
96	2	16	3	3	1	1	0	2	1	1	3	3	1	1	0	2	1	0	1
97	2	17	3	1	2	1	1	2	2	1	3	3	1	2	1	2	1	0	1
98	1	16	3	1	4	2	2	2	3	2	2	2	3	2	2	2	2	0	1
99	2	16	3	3	1	1	0	2	2	1	3	3	1	1	0	2	1	0	1
100	2	16	2	1	2	2	1	2	1	1	2	2	3	2	1	2	1	0	1
101	2	16	3	3	2	1	0	2	2	1	3	3	1	1	0	2	2	0	1
102	2	-1	2	2	2	2	2	2	3	1	2	2	2	1	1	2	2	0	1
103	2	16	2	2	3	2	1	2	1	1	2	2	3	2	1	2	1	0	1
104	1	17	1	1	3	2	3	2	1	1	2	3	3	1	2	1	2	0	1
105	1	16	1	3	3	2	2	2	2	2	2	3	3	2	2	2	2	2	1
106	1	16	2	3	2	1	2	2	2	1	2	3	3	1	1	2	1	0	1
107	1	16	3	3	1	1	0	2	1	1	1	3	4	1	2	2	1	0	1
108	2	16	2	3	2	2	1	2	2	1	3	3	1	1	0	2	2	0	1
109	1	16	2	2	3	2	2	2	1	1	2	2	4	2	2	2	1	2	2
110	1	16	2	2	3	2	2	1	1	1	2	2	3	2	2	2	1	0	1
111	1	16	2	1	3	2	1	2	1	1	2	2	2	2	1	2	1	0	1
112	1	17	1	1	2	1	2	2	1	1	2	2	1	1	2	2	1	0	1
113	1	16	1	2	3	2	2	2	2	1	1	1	3	2	2	2	2	0	1
114	1	16	2	3	4	1	2	2	1	1	2	2	3	2	2	2	2	0	1
115	1	17	2	2	4	2	2	2	1	1	3	2	4	2	2	2	1	0	1
116	1	17	3	2	2	1	2	2	1	1	1	1	3	2	2	2	1	0	1
117	1	17	1	1	4	2	1	3	1	1	3	2	3	2	2	2	1	0	1
118	2	15	3	2	2	1	1	2	1	1	3	2	2	2	1	2	1	0	1
119	2	17	3	3	2	1	1	2	1	1	3	3	1	1	2	2	1	0	1
120	1	17	3	2	3	2	1	2	1	1	3	2	3	1	2	2	1	0	1
121	2	16	3	3	1	1	0	2	1	1	3	3	1	1	0	2	1	0	1
122	2	17	3	3	1	1	0	2	3	1	3	3	1	1	0	2	2	0	1
123	2	16	2	2	3	2	1	2	1	1	2	2	3	2	2	2	1	0	1
124	2	17	1	1	2	2	2	2	3	1	3	1	3	1	2	2	2	0	1
125	1	17	1	1	4	2	2	2	2	1	1	1	3	2	3	2	1	0	1
126	2	16	2	3	2	1	1	2	3	1	2	2	3	1	1	2	2	0	1
127	1	16	1	2	3	2	2	2	2	1	2	1	3	2	2	2	1	0	1
128	2	16	3	3	1	1	0	2	4	1	3	3	1	1	0	2	2	0	1
129	2	17	3	3	1	1	0	2	4	1	3	3	1	1	0	2	1	0	1
130	2	17	2	2	4	2	1	2	2	1	3	2	3	2	1	2	2	0	1
131	2	17	3	2	2	1	1	2	1	1	3	2	2	1	1	2	1	0	1
132	2	17	3	2	2	1	1	2	2	1	2	2	2	1	1	2	1	0	1
133	2	17	3	3	1	1	0	2	3	1	3	3	1	1	1	2	2	0	1
134	1	16	1	1	4	2	3	2	2	1	1	1	2	1	2	2	2	0	1
135	2	17	2	2	3	3	1	2	2	1	2	2	3	2	1	2	2	0	1
136	1	16	1	2	3	1	1	2	3	1	2	3	2	1	1	1	2	0	1
137	2	16	3	2	3	3	1	2	3	1	2	2	2	2	1	2	2	0	1
138	1	16	3	3	1	1	0	2	3	1	3	3	1	1	0	2	1	0	1
139	2	17	3	3	1	1	0	2	4	1	3	3	1	1	0	1	3	0	1
140	1	17	2	2	2	2	2	2	1	1	2	2	3	2	2	2	1	0	1
141	1	17	1	1	4	2	2	2	1	1	1	2	3	2	2	2	1	0	1
142	2	17	1	1	1	2	1	2	1	2	3	3	1	1	0	2	1	0	1
143	2	16	3	3	1	1	0	2	2	2	3	3	1	1	0	2	1	0	1
144	2	16	3	1	3	2	2	2	2	1	2	2	4	3	2	2	2	0	1
145	1	16	2	2	3	2	1	2	2	1	2	2	3	1	1	2	1	0	1
146	2	17	3	2	3	1	1	2	2	1	3	2	3	1	1	2	1	0	1
147	1	16	2	2	3	2	3	2	1	1	1	1	3	2	3	3	1	0	1
148	1	16	3	2	3	2	1	2	2	1	2	2	4	2	1	2	2	0	1
149	2	16	1	3	2	1	0	2	4	2	3	3	1	1	0	2	3	0	1
150	1	16	3	2	2	1	1	2	1	1	3	3	1	1	0	2	1	0	1
151	2	16	3	3	1	1	0	2	3	1	3	3	1	1	0	2	3	0	1
152	1	16	1	3	2	1	3	2	1	1	1	3	2	1	3	2	2	0	1
153	2	16	3	3	1	1	0	2	2	1	2	2	3	2	1	2	2	0	1
154	1	16	3	3	1	1	0	2	2	1	3	1	4	1	3	2	3	0	1
155	1	16	3	3	1	1	0	1	3	1	3	3	1	1	0	2	3	0	1
156	1	16	1	1	4	2	2	2	1	1	1	1	4	2	2	2	2	0	1
157	2	16	2	2	4	2	2	2	1	1	2	2	4	2	2	2	2	0	1
158	1	16	1	1	4	2	3	3	3	1	1	1	4	2	3	3	3	0	1
159	2	16	3	2	3	2	2	2	2	1	2	3	3	1	2	2	2	0	1
160	1	16	3	2	3	2	1	2	2	1	3	2	3	2	1	2	2	0	1
161	1	16	1	2	4	1	2	2	1	1	1	2	4	1	1	2	1	0	1
162	2	16	2	2	2	1	1	2	4	1	3	3	1	1	0	2	1	0	1
163	2	16	3	3	1	1	0	2	2	1	3	3	1	1	0	2	2	0	1
164	1	16	1	2	4	3	4	2	3	1	2	2	3	3	3	2	1	0	1
165	1	16	1	1	4	2	3	2	1	1	1	1	3	2	3	2	1	0	1
166	2	16	3	3	1	1	0	2	3	1	3	3	1	1	0	2	2	0	1
167	1	17	1	1	4	2	3	2	2	1	1	1	4	2	3	2	2	0	1
168	1	16	2	2	4	2	2	2	2	1	1	2	4	2	2	2	2	0	1
169	2	17	3	2	3	2	2	3	4	2	3	2	3	2	2	3	3	2	1
170	1	16	1	2	3	1	3	2	1	1	1	2	3	1	3	1	2	0	1
171	1	17	1	1	2	1	3	2	3	1	1	2	2	1	2	2	2	0	1
172	1	16	3	2	3	2	2	2	1	1	3	2	3	2	2	2	1	0	1
173	1	16	2	3	3	2	2	2	1	2	2	3	3	1	2	2	1	2	1
174	2	17	2	2	2	2	1	3	1	1	2	2	2	1	1	2	1	0	1
175	2	16	1	1	4	2	3	2	1	1	1	1	4	3	4	2	2	0	1
176	2	16	1	3	3	1	2	2	2	1	3	3	1	1	2	2	2	0	1
177	2	16	2	3	2	1	1	2	2	1	3	3	1	1	1	2	1	0	1
178	2	17	2	2	3	2	2	2	2	2	2	2	3	2	2	2	3	2	1
179	2	16	1	2	2	1	1	2	3	1	2	2	2	2	1	2	3	0	1
180	2	17	2	2	4	2	2	2	2	1	3	1	4	2	2	2	1	0	1
181	2	16	2	2	4	2	2	2	2	2	2	2	4	1	2	1	2	2	1
182	1	16	3	1	2	1	2	2	1	1	2	2	3	2	2	2	1	0	1
183	2	16	2	3	2	1	2	2	2	1	2	3	2	1	1	2	2	0	1
184	2	16	3	3	1	1	0	2	2	1	3	3	1	1	0	2	1	0	1
185	2	16	1	3	4	1	2	2	2	1	3	2	3	1	1	3	2	2	2
186	1	16	1	1	4	2	2	2	3	1	1	1	4	2	2	1	2	0	1
187	2	16	3	3	1	1	0	2	1	1	3	3	1	1	0	2	1	0	1
188	2	16	3	3	1	1	0	2	2	1	2	3	2	1	1	2	2	0	1
189	1	16	3	2	3	1	1	2	1	1	3	2	3	1	1	2	1	0	1
190	2	17	3	2	3	2	1	2	1	1	3	2	3	2	1	2	4	0	1
191	1	16	2	2	4	2	1	2	1	1	3	3	2	2	1	2	1	0	1
192	2	17	3	3	1	1	1	2	1	1	3	2	2	1	1	2	2	0	1
193	2	17	3	2	2	1	1	2	1	1	3	2	2	1	1	2	2	0	1
194	2	17	3	3	1	1	1	2	2	1	3	3	1	1	0	3	3	0	1
195	2	16	3	3	1	1	0	2	2	1	3	3	1	1	0	2	2	0	1
196	2	16	2	3	4	2	2	2	2	1	2	3	4	2	2	2	3	0	1
197	2	17	3	2	3	2	1	2	3	1	3	1	3	2	1	2	3	0	1
198	1	16	2	2	4	2	3	2	2	1	2	2	4	2	2	2	1	0	1
199	1	16	2	2	3	1	2	2	3	1	2	2	4	2	2	2	3	0	1
200	1	16	2	2	3	2	2	2	2	1	2	2	3	2	3	2	2	0	1
201	2	16	2	2	2	2	1	2	4	2	2	2	2	2	1	2	4	2	1
202	1	16	3	1	4	2	3	2	2	2	1	2	4	4	3	2	2	0	1
203	2	17	3	3	1	1	0	1	1	1	3	3	1	1	0	2	1	0	1
204	2	16	3	3	1	1	0	2	3	2	3	3	1	1	1	2	2	2	1
205	1	16	3	1	3	2	2	2	1	1	1	2	4	2	2	2	1	0	1
206	1	17	3	2	2	1	1	2	1	1	3	3	1	1	1	2	2	0	1
207	1	16	2	3	2	1	2	2	2	1	2	3	2	1	2	2	2	0	1
208	1	16	3	3	1	1	0	2	3	1	2	2	3	1	2	2	3	0	1
209	1	16	2	2	2	2	1	2	1	1	2	2	2	2	1	2	1	0	1
210	2	16	3	3	1	1	0	3	2	1	3	3	1	1	0	2	1	0	1
211	1	16	2	2	3	1	1	3	1	1	3	2	3	2	1	2	1	0	1
212	2	17	3	3	1	1	0	2	1	1	3	3	1	1	0	2	1	0	1
213	1	17	2	2	4	2	2	2	2	1	3	2	4	2	2	2	1	0	1
214	1	16	1	1	4	3	2	3	1	1	3	2	4	3	4	2	1	0	1
215	1	16	1	2	3	2	2	2	2	1	3	1	4	2	1	2	1	0	1
216	1	16	2	3	2	1	1	2	2	1	2	2	2	1	1	2	1	0	1
217	1	16	2	2	3	1	1	3	1	1	2	2	3	1	1	2	1	0	1
218	2	16	3	3	1	1	0	2	1	1	3	3	1	1	0	2	1	0	1
219	1	17	1	1	4	2	2	2	1	1	3	2	4	2	2	2	1	0	1
220	2	17	3	1	4	2	2	2	3	1	3	2	4	2	2	2	3	0	1
221	2	17	3	3	1	1	0	2	2	1	3	3	1	1	0	2	2	0	1
222	2	16	3	3	1	1	0	2	1	1	2	3	2	1	1	2	1	0	1
223	1	17	3	1	4	2	2	2	2	1	3	1	4	2	2	1	2	0	1
224	2	16	2	2	2	2	2	2	1	1	2	3	2	2	1	2	1	0	1
225	1	17	3	2	3	2	2	2	2	1	2	2	3	2	2	2	2	0	1
226	2	17	3	2	3	2	2	2	2	1	3	2	3	2	2	2	3	0	1
227	1	16	1	1	3	2	1	2	2	1	2	2	3	2	2	2	2	0	1
228	2	16	3	3	1	1	0	2	2	1	2	3	2	1	1	2	2	0	1
229	2	17	2	2	3	2	1	2	2	1	2	2	3	2	1	2	2	0	1
230	2	16	3	3	1	1	0	2	1	1	3	3	3	1	1	2	1	0	1
231	2	17	2	2	2	1	1	2	1	1	2	2	2	2	1	2	1	0	1
232	2	16	2	2	3	1	1	2	2	1	2	2	2	1	2	2	3	0	1
233	2	16	2	3	2	2	1	2	1	1	2	3	3	2	2	2	1	0	1
234	2	17	1	3	2	1	1	2	2	1	3	3	1	1	0	2	2	0	1
235	2	16	2	2	3	4	1	2	2	1	2	2	3	2	1	2	1	0	1
236	2	16	1	1	4	3	2	2	1	1	1	1	4	2	2	2	2	0	1
237	1	16	2	2	2	2	1	2	1	1	2	2	3	2	2	2	1	0	1
238	2	16	3	3	1	1	0	2	3	1	3	3	1	1	0	2	2	0	1
239	1	16	1	3	3	1	1	2	1	1	2	2	3	1	1	2	1	0	1
240	1	16	3	1	4	2	2	2	1	1	2	1	4	2	1	2	1	0	1
241	1	17	3	1	4	3	2	2	1	1	3	1	4	3	2	2	1	0	1
242	1	17	3	1	3	2	2	2	2	1	3	2	3	2	1	1	2	0	1
243	2	16	2	2	2	2	1	3	1	1	2	2	2	1	1	3	1	0	1
244	2	16	2	2	3	2	2	2	1	1	2	1	2	2	2	2	1	0	1
245	1	16	2	2	2	1	2	2	2	1	2	2	2	1	1	2	2	0	1
246	1	16	2	2	3	2	1	2	1	1	2	3	3	3	1	2	1	0	1
247	2	16	2	2	3	1	2	2	2	1	2	3	3	1	1	2	3	0	1
248	2	16	2	2	2	1	3	2	2	1	3	3	1	1	0	2	1	0	1
249	2	15	2	2	3	3	2	2	3	1	2	3	3	2	2	2	2	0	1
250	2	16	1	1	2	2	1	2	3	1	3	1	3	1	1	2	3	0	1
251	1	17	3	3	1	1	1	2	2	1	3	3	1	1	0	2	1	0	1
252	2	17	2	2	2	2	1	2	3	1	2	2	2	2	2	2	1	0	1
253	1	17	3	2	2	1	2	2	3	1	2	2	3	2	2	2	2	0	1
254	2	16	3	3	1	1	0	2	2	1	2	2	2	1	1	2	3	0	1
255	2	17	2	3	4	2	2	2	3	1	2	3	4	2	2	2	2	0	1
256	2	16	1	1	4	3	1	2	4	2	1	1	4	2	1	2	1	2	1
257	2	17	3	2	2	1	1	2	2	1	3	3	1	1	1	2	1	0	1
258	2	16	2	3	4	3	2	2	3	1	2	2	3	3	2	2	2	0	1
259	1	17	3	2	2	1	2	2	1	1	2	2	2	2	2	2	1	0	1
260	2	16	3	3	1	0	0	2	2	1	1	3	1	1	1	2	3	0	1
261	2	16	3	3	1	3	0	2	2	1	3	3	1	1	1	2	2	0	1
262	2	17	2	3	1	1	0	2	1	1	2	2	3	2	1	2	3	0	1
263	1	17	3	1	4	2	2	2	1	1	3	1	4	2	3	2	2	0	1
264	1	17	2	1	3	2	2	2	1	1	1	1	4	4	3	2	1	0	1
265	1	16	2	1	2	1	2	2	1	1	2	2	2	2	2	2	2	0	1
266	1	16	1	2	3	1	2	2	1	1	2	2	3	1	2	2	1	0	1
267	1	17	2	1	4	2	2	2	1	1	1	1	3	1	2	2	1	0	1
268	1	17	1	2	3	2	2	2	1	1	3	2	3	2	2	2	2	0	1
269	1	17	2	2	2	1	1	2	2	1	2	2	2	2	2	2	2	0	1
270	1	16	1	1	4	3	4	2	1	1	1	1	4	3	3	2	1	0	1
271	1	16	2	2	3	1	2	2	3	1	2	3	2	1	3	2	2	0	1
272	2	17	2	1	3	2	1	2	2	1	1	2	3	2	1	2	2	0	1
273	1	16	2	2	2	2	2	2	2	1	2	2	2	1	2	2	2	0	1
274	1	17	3	3	1	1	0	2	1	1	3	3	1	1	0	2	1	0	1
275	1	17	3	2	2	2	1	2	2	1	2	2	3	2	1	2	2	0	1
276	1	16	3	3	2	1	2	2	2	1	1	2	3	1	2	2	3	0	1
277	1	16	1	2	4	1	3	2	3	2	1	2	4	2	3	1	3	2	1
278	2	16	3	3	1	1	0	2	2	1	2	3	3	1	1	2	2	0	1
279	1	16	2	3	2	1	1	2	2	1	2	3	2	1	1	2	2	0	1
280	1	16	1	2	4	2	2	2	1	1	1	2	4	2	2	2	1	0	1
281	2	15	1	2	4	2	2	2	2	1	1	2	4	3	2	2	1	0	1
282	2	17	2	1	3	2	1	2	3	1	2	2	3	2	1	2	2	0	1
283	2	17	3	3	1	1	0	2	1	1	3	3	2	1	1	2	2	0	1
284	2	17	3	3	1	1	0	2	1	1	3	3	1	1	0	2	1	0	1
285	1	17	1	2	4	4	3	2	2	1	1	1	4	4	4	2	2	0	1
286	1	16	2	2	3	1	2	1	2	1	2	2	3	1	2	2	2	0	1
287	1	16	3	3	1	1	1	2	1	1	3	3	1	1	0	2	1	0	1
288	1	17	2	1	4	2	2	2	2	1	3	1	4	3	2	2	1	0	1
289	1	16	2	1	3	2	2	3	2	1	3	2	3	2	2	2	1	0	1
290	1	16	1	1	3	2	1	2	1	1	1	1	4	4	3	2	4	0	1
291	1	17	2	2	3	1	2	2	2	1	2	3	3	1	2	2	2	2	2
292	1	17	1	1	4	4	2	2	3	1	2	2	4	4	2	2	2	0	1
293	1	16	3	1	3	1	1	2	1	1	2	2	2	1	2	2	3	0	1
294	1	17	3	2	4	2	2	2	3	1	3	2	4	2	2	2	3	2	2
295	1	16	2	2	2	1	1	2	3	1	2	2	2	1	1	2	1	0	1
296	1	16	1	2	4	2	1	2	2	1	2	2	3	1	1	2	1	2	2
297	1	17	1	3	3	2	2	2	2	1	1	2	4	3	2	1	2	2	2
298	1	17	1	1	4	3	2	2	2	1	1	1	4	3	3	2	1	0	1
299	1	16	2	2	2	1	2	2	2	1	2	2	2	1	1	2	2	0	1
300	1	16	3	3	1	0	0	2	3	1	2	3	2	1	2	2	3	0	1
301	1	16	1	1	4	2	4	3	3	1	2	2	4	2	4	3	2	2	2
302	1	17	1	1	4	2	2	1	3	2	1	1	4	2	3	2	2	2	1
303	1	16	2	2	3	1	2	2	1	1	1	2	3	1	2	2	2	0	1
304	1	16	3	3	3	1	2	2	2	1	2	2	2	1	2	2	2	0	1
305	1	16	3	1	4	3	3	2	2	1	2	1	4	3	4	2	2	0	1
306	1	16	2	2	3	2	1	2	2	1	3	3	2	2	1	2	3	2	2
307	1	16	1	1	4	2	3	2	1	1	1	2	3	1	3	2	1	0	1
308	1	16	2	2	3	1	1	2	1	1	2	2	3	1	2	2	1	0	1
309	1	16	3	2	2	1	1	2	1	1	2	3	3	1	2	2	1	0	1
310	0	17	1	1	4	2	3	2	1	1	1	1	2	1	4	2	1	0	1
311	1	17	2	1	4	2	2	2	1	1	2	1	4	2	2	2	1	0	1
312	1	16	3	1	1	1	1	2	2	1	1	1	1	1	1	1	1	0	1
313	1	16	3	3	1	1	0	2	1	1	3	3	1	1	0	2	1	0	1
314	1	16	1	3	4	3	2	2	3	1	1	3	4	3	2	2	2	0	1
315	1	17	1	3	3	2	2	2	1	1	2	3	3	2	2	2	2	0	1
316	1	16	1	2	3	2	2	2	2	1	2	2	3	2	1	2	2	0	1
317	1	16	1	2	4	1	3	2	1	1	1	2	4	1	3	2	1	0	1
318	1	17	2	2	4	2	2	2	1	1	2	2	4	2	2	2	1	0	1
319	1	16	1	1	4	3	3	2	1	1	1	1	4	2	3	2	2	0	1
320	1	17	3	3	3	1	1	2	1	1	3	3	2	1	1	2	1	0	1
321	1	16	1	1	4	2	2	2	3	1	1	1	4	2	3	2	3	0	1
322	2	17	2	3	3	2	1	2	1	1	2	3	3	1	2	2	1	0	1
323	2	16	3	1	3	2	2	2	2	1	3	1	3	2	2	2	3	0	1
324	1	17	3	3	1	1	0	2	2	1	3	3	1	1	1	2	1	0	1
325	2	16	3	3	1	1	0	2	2	1	3	3	1	1	0	2	2	0	1
326	2	16	2	2	2	1	1	2	2	1	3	2	2	1	1	2	2	0	1
327	2	16	2	1	4	3	2	2	3	1	2	1	4	3	2	3	2	0	1
328	2	17	2	2	3	2	2	2	3	1	2	2	2	1	1	2	3	0	1
329	2	16	2	3	2	1	1	2	2	1	2	2	2	1	1	2	3	0	1
330	2	17	2	2	3	2	2	2	3	1	1	1	3	2	2	2	2	0	1
331	2	16	3	1	3	3	3	2	3	1	2	1	4	3	3	2	3	0	1
332	2	16	3	2	3	1	1	2	3	1	3	2	3	1	1	2	2	0	1
333	1	17	3	3	1	1	0	3	2	1	3	3	1	1	0	3	2	0	1
334	1	16	3	3	1	1	0	3	3	1	3	3	1	1	1	2	1	0	1
335	2	15	3	2	3	2	1	2	2	1	2	3	3	2	1	2	2	0	1
336	2	17	3	3	1	1	0	2	1	1	3	3	1	1	0	2	1	0	1
337	2	16	2	3	3	1	1	2	3	1	3	3	1	1	0	2	2	0	1
338	2	16	3	3	1	1	0	2	2	1	3	3	1	1	0	2	2	0	1
339	2	16	2	2	3	3	2	2	3	1	3	3	1	1	0	2	2	0	1
340	1	17	2	2	4	2	2	2	2	1	2	2	3	2	2	2	1	0	1
341	1	16	1	1	2	2	2	2	1	1	1	1	4	2	1	2	1	0	1
342	2	17	3	2	2	1	1	2	1	1	2	2	2	1	1	2	2	0	1
343	1	17	1	2	4	2	3	2	1	1	1	1	2	2	2	2	2	0	1
344	1	17	3	2	2	2	3	2	1	1	1	1	4	2	3	2	1	0	1
345	2	16	2	2	2	1	1	2	3	1	3	3	1	1	0	2	2	0	1
346	1	16	3	3	1	1	0	2	1	1	3	3	1	1	0	2	1	0	1
347	2	16	2	2	1	1	1	2	2	1	3	3	1	1	0	2	2	0	1
348	2	17	1	1	4	3	3	2	2	1	1	1	3	3	3	2	2	0	1
349	2	17	3	3	1	1	0	2	3	1	3	3	1	1	1	2	3	0	1
350	2	16	3	3	1	1	0	2	1	1	3	3	1	1	0	2	1	0	1
351	2	16	3	3	1	1	0	2	3	1	3	3	1	1	1	2	3	0	1
352	2	16	3	3	1	1	0	2	2	1	3	3	1	1	0	2	2	0	1
353	2	16	3	3	1	1	0	2	2	1	3	3	1	1	0	2	1	0	1
354	2	17	3	3	1	1	0	2	2	1	3	3	1	1	0	2	2	0	1
355	2	16	3	3	1	1	0	2	1	1	3	3	1	1	0	2	1	0	1
356	2	17	3	3	1	1	0	2	1	1	3	3	1	1	0	2	1	0	1
357	2	16	3	3	1	1	0	2	1	1	3	3	1	1	0	2	1	0	1
358	2	16	3	3	1	1	0	2	1	1	3	3	1	1	0	2	1	0	1
359	2	16	3	2	2	1	1	2	1	1	3	1	3	2	1	2	1	0	1
360	2	17	3	3	1	1	0	2	1	1	3	3	1	1	0	2	1	0	1
361	2	16	3	3	1	1	0	2	1	1	3	3	1	1	0	2	1	0	1
362	1	17	1	1	3	2	2	2	3	1	2	3	4	2	1	2	1	0	1
363	1	17	1	1	4	2	3	2	2	1	2	1	4	2	2	2	3	2	2
364	2	16	3	3	1	1	0	2	2	1	3	3	1	1	1	2	2	0	1
365	1	18	3	2	2	1	1	1	2	1	3	3	1	1	0	2	3	0	1
366	1	16	1	1	4	2	4	3	1	1	1	1	4	2	2	3	1	0	1
367	2	16	3	2	3	1	1	2	2	1	2	2	3	1	1	2	1	0	1
368	2	16	3	2	2	1	1	2	2	1	2	2	3	2	2	2	1	0	1
369	1	16	3	1	4	2	2	2	1	1	3	1	4	2	3	2	1	0	1
370	1	17	3	1	4	2	2	2	1	1	3	1	4	2	2	2	2	0	1
371	1	16	2	2	2	1	1	2	1	1	2	2	2	2	1	2	1	0	1
372	0	17	2	2	2	2	1	2	1	1	2	2	2	2	1	2	1	0	1
373	1	16	1	1	4	2	2	2	1	1	1	1	4	2	4	2	1	0	1
374	2	16	3	1	2	1	1	2	3	1	3	3	2	1	1	2	3	0	1
375	2	17	2	2	4	2	2	2	2	1	1	2	4	2	2	2	1	0	1
376	1	17	3	3	1	1	1	2	1	1	3	3	1	1	1	2	1	0	1
377	2	17	3	3	1	1	0	2	1	1	3	3	1	1	1	2	1	0	1
378	1	17	2	2	2	2	2	2	2	1	1	2	3	2	2	2	1	0	1
379	2	16	3	3	1	1	0	2	2	1	3	3	1	1	0	2	2	0	1
380	2	16	3	3	1	1	0	2	3	1	3	3	1	1	1	2	2	0	1
381	1	16	2	2	4	2	2	3	1	1	2	2	4	2	2	2	1	0	1
382	2	-1	3	3	1	1	0	2	1	1	3	3	1	1	1	2	1	0	1
383	1	17	3	2	2	1	1	2	3	1	2	2	2	1	1	2	2	0	1
384	2	16	3	3	3	1	1	2	2	1	2	3	2	1	1	2	2	0	1
385	2	16	3	3	1	1	1	2	1	1	3	3	1	1	0	2	1	0	1
386	1	16	2	3	3	1	3	2	3	1	2	3	3	1	2	2	1	0	1
387	1	17	1	1	4	2	2	2	1	1	1	1	3	2	2	2	1	0	1
388	2	16	2	2	2	2	2	2	1	1	3	2	2	2	2	2	1	0	1
389	1	16	2	2	2	1	2	2	1	1	3	3	1	1	1	2	1	0	1
390	1	16	3	2	3	2	2	2	2	1	3	2	3	2	1	2	2	0	1
391	2	16	2	2	4	1	1	2	2	1	2	2	3	3	1	2	1	0	1
392	1	17	2	2	3	2	2	2	2	1	2	2	2	2	2	2	1	0	1
393	1	17	3	3	1	1	0	2	1	1	3	3	1	1	1	2	1	0	1
394	1	16	2	2	3	2	2	2	1	1	1	1	3	2	1	2	1	0	1
395	1	16	2	2	3	2	3	2	2	1	1	1	3	2	3	2	2	0	1
396	1	17	3	3	1	1	0	2	2	1	3	3	1	1	0	2	2	0	1
397	1	16	1	1	4	2	3	2	1	1	1	1	4	3	3	2	2	0	1
398	1	16	1	1	4	2	2	2	1	1	1	1	4	3	3	2	1	0	1
399	1	16	1	1	4	2	2	2	1	1	2	2	3	2	2	2	1	0	1
400	1	16	3	1	2	1	2	2	2	1	3	1	3	1	1	2	2	0	1
401	1	17	2	3	2	1	2	2	1	1	2	1	2	4	4	1	4	0	1
402	1	17	3	3	1	1	0	2	3	1	3	3	1	1	0	2	2	0	1
403	1	17	3	2	3	2	2	2	2	1	2	1	2	3	1	1	4	0	1
404	1	17	3	2	3	1	2	2	2	1	2	2	3	1	2	2	1	0	1
405	1	16	3	3	1	1	0	2	2	1	2	2	2	2	2	2	1	0	1
406	1	17	3	3	1	1	0	2	1	1	3	3	1	1	0	2	1	0	1
407	1	16	2	2	2	1	1	2	2	1	3	3	3	2	2	2	2	0	1
408	1	16	1	2	4	3	3	2	2	1	1	2	4	3	4	2	3	0	1
409	1	17	3	2	2	1	2	2	3	1	3	2	2	1	2	2	2	0	1
410	1	17	1	1	4	2	2	2	1	1	2	2	2	2	1	2	1	0	1
411	1	16	2	2	4	3	3	2	2	1	2	2	4	2	3	2	2	0	1
412	1	16	2	3	3	2	1	2	1	1	3	3	1	1	0	2	1	0	1
413	2	16	3	3	1	1	1	2	1	1	3	3	1	1	0	2	1	0	1
414	1	17	3	3	1	1	1	2	1	1	2	1	2	4	4	1	4	0	1
415	1	16	1	3	3	1	2	2	2	1	1	1	3	2	2	2	1	0	1
416	1	16	2	2	2	1	1	2	2	1	2	2	2	1	1	2	2	2	2
417	2	17	2	2	2	1	1	2	3	1	2	2	2	1	1	2	2	0	1
418	2	17	3	3	1	1	1	2	2	1	3	3	1	1	0	2	2	0	1
419	2	16	3	1	2	1	1	2	2	1	3	1	2	2	1	2	1	0	1
420	2	17	3	1	3	2	2	2	2	1	3	1	4	2	1	2	3	0	1
421	2	16	3	2	1	1	1	2	2	1	3	3	1	1	0	2	3	0	1
422	2	16	2	2	4	2	1	2	3	1	3	2	3	2	1	2	2	0	1
423	2	16	3	3	1	1	1	2	1	1	3	3	1	1	0	2	1	0	1
424	2	16	3	3	1	1	1	2	2	1	3	3	1	1	0	2	1	0	1
425	2	16	3	3	1	1	1	2	1	1	3	3	1	1	0	2	1	0	1
426	2	17	1	2	4	1	2	2	3	1	3	3	1	1	0	2	1	0	1
427	2	16	3	3	1	1	1	2	2	1	3	3	1	1	0	2	2	0	1
428	2	17	2	1	4	2	1	2	2	1	3	2	4	2	1	2	1	0	1
429	2	17	3	3	1	1	1	2	2	1	3	3	1	1	1	2	1	0	1
430	2	17	3	3	1	1	1	2	2	1	3	3	1	1	0	2	1	0	1
431	2	17	3	3	1	1	1	2	1	1	3	1	1	1	2	2	2	0	1
432	1	16	1	1	4	1	2	2	1	1	1	1	4	1	2	2	1	0	1
433	2	17	2	2	3	1	2	2	1	1	3	2	2	1	1	2	1	0	1
434	1	17	1	1	4	2	2	1	2	1	1	1	4	2	2	2	1	0	1
435	1	17	3	1	3	1	3	2	1	1	2	2	3	1	3	2	1	0	1
436	2	17	3	2	4	1	1	2	3	1	3	3	1	1	0	2	2	0	1
